# Supplementary material
Source: publisher figshare collection journal article supplement (https://tandf.figshare.com/ndownloader/files/16346990)
Supplement: Supplementary file 1 [file 16346990]

**Facesheet Information**

Age

Gender

Educational Background/CBIS

Years working in the field

What type of brain injury rehabilitation services do you provide?

Case management Counseling Job coaching Skills training in home/community

Facilitating Groups

Do you have a loved one who has a TBI?

**Purpose of study**

I am studying what it’s like for professionals to work in brain injury rehabilitation. I will be asking about your experiences working with clients and their families, as well as what it’s like for you to work with other professionals and your experiences of supervision.

**Career Experience**

What is it like for you to work in brain injury rehabilitation?

What are the positives?

What are the negatives?

Do you work on an interdisciplinary team?

What is that like for you?

What is it like working with your supervisors?

What do you find to be the most difficult aspect of working in brain injury rehabilitation?

What do you find to be the least difficult aspect in working in brain injury rehabilitation?

**Work-related Stress**

What about working in brain injury rehabilitation do you find stressful?

In what circumstances do you start feeling stress?

What about working with clients is stressful?

Cognitive impairments?

Behavioral changes?

Sad stories?

What about working with families is stressful?

What about administrative duties such as documentation is stressful?

What about working with funding sources is stressful?

What about working with limited funding?

What is it like for you when you can’t help a client due to lack of funding or funding constraints?

Have you ever found yourself to become overwhelmed?

Have you ever experienced emotional exhaustion or distancing yourself from clients to cope?

What are signs/symptoms that you are experiencing this?

    Tell me what that is like for you.

What do you do to reduce your level of stress when experiencing work-related stress?

What do you find helpful in reducing your stress levels?

What do you find unhelpful in reducing your stress levels?
What do you think about breaks?

Do you get a break daily?

Is this helpful/unhelpful?

How do you think this affects/does not affect your stress levels?

How does your level of stress affect you at work?

Work with clients?

Working with co-workers?

Working with supervisors?

How does your level of stress affect your personal life outside of work?

If one of your co-workers is experiencing stress, does that affect the rehabilitation environment?

Does that affect interactions with clients?

Their families?

Interactions with co-workers?

Interactions with supervisors?

Why do you think professionals in brain injury rehab experience high rates of work related stress?

What about working in brain injury rehab causes high levels of stress?

What have you noticed in your co-workers?

Are there high turnover rates at your agency?

If so, why do you think that is?

If not, why do you think that is?

**Supervision, Support and Training**

What clinical supervision do you receive?

What is it like for you?

What is most helpful?

What is not so helpful?

What issues do you wish you could get better or more frequent supervision for?

What informal supervision do you receive from supervisors and/or co-workers?

      What is that like for you?

Is it helpful/unhelpful?

Do you feel that you can openly share your thoughts and feelings with your supervisor?

What formal training or education do you receive?

How is this helpful/unhelpful?

What does your agency do to reduce staff stress and burnout?

What do you find helpful?

What do you find unhelpful?

Do you think it is effective in reducing staff stress?

Why/Why not

How do you think your agency can better help to reduce staff stress and burnout?

**Debriefing questions**

Is there anything that I didn’t ask that I should have asked?

Is there anything you think I should know that would help me better understand this topic?

What advice would you have for other brain injury professionals to minimize burnout?

What advice would you give to administrators and clinical supervisors?
